# Supplementary material for: Radical-cation salts of BEDT-TTF with tris-coordinated racemic dysprosium(iii) and terbium(iii) anions
Source: Royal Society of Chemistry journal article supplement (doi:10.1039/d4dt03484h), 2025-01-01
Supplement: d4dt03484h1.pdf [file d4dt03484h1.pdf]

## Radical-cation salts of BEDT-TTF with tris-coordinated racemic dysprosium(III) and terbium(III) anions

Emily Howarth,<sup>a</sup> Jordan Lopez,<sup>a</sup> Joseph O. Ogar,<sup>a</sup> Toby J. Blundell,<sup>a</sup> Hiroki Akutsu,<sup>b</sup> Yasuhiro Nakazawa,<sup>b</sup> Shusaku Imajo,<sup>c</sup> Yoshihiko Ihara,<sup>d</sup> Simon J. Coles,<sup>e</sup> Peter N. Horton,<sup>e</sup> Jeppe Christensen<sup>e</sup> and Lee Martin<sup>\*a</sup>

<sup>a</sup>*School of Science and Technology, Nottingham Trent University, Clifton Lane, Clifton, Nottingham, NG11 8NS, UK; lee.martin@ntu.ac.uk*

<sup>b</sup>*Department of Chemistry, Graduate School of Science, Osaka University, 1-1 Machikaneyama-cho, Toyonaka, Osaka 560-0043, Japan.*

<sup>c</sup>*The Institute for Solid State Physics, The University of Tokyo, Kashiwa, Chiba 277-8581, Japan*

<sup>d</sup>*Department of Quantum and Condensed Matter Physics, School of Science, Hokkaido University, Kita-ku, Sapporo, 060-0810, Hokkaido, Japan*

<sup>e</sup>*School of Chemistry, Faculty of Natural and Environmental Sciences, University of Southampton, Highfield, Southampton, SO17 1BJ, UK*

### Supplementary Information



**Fig. S1** Molecular structure of the 1.5 crystallographically independent clo ligands of **Dy**. (a) The clo with O9. (b) The clo with O5.



### Overlap Integrals

M = Tb (293 K)    M = Dy (30 K)

|               |                     |                     |
|---------------|---------------------|---------------------|
| $p1 =$        | $2.633 \times 10^3$ | $4.279 \times 10^3$ |
| $p2 = -p2' =$ | 4.660               | 2.492               |
| $p3 =$        | -3.077              | -5.137              |
| $a1 = -a1' =$ | 8.288               | 11.040              |
| $a2 =$        | 3.429               | 7.715               |
| $b1 =$        | 6.081               | 5.989               |
| $b2 =$        | 9.089               | 3.279               |
| $c1 = -c1' =$ | 8.524               | 5.845               |

**Fig. S2** Donor arrangement of Tb and Dy
